# Supplementary material for: Preparation of bimetallic Au/Pt nanotriangles with tunable plasmonic properties and improved photocatalytic activity
Source: Royal Society of Chemistry journal article supplement (doi:10.1039/c8dt03482f), 2018-01-01
Supplement: c8dt03482f1.pdf [file c8dt03482f1.pdf]

# Preparation of Bimetallic Au/Pt Nanotriangles with Tunable Plasmonic Properties and Improved Photocatalytic Activity

*Liang Ma\*<sup>a</sup>, Si-Jing Ding<sup>b</sup>, Da-Iie Yang<sup>c</sup>*

*<sup>a</sup> School of Photoelectric Information and Energy Engineering, Wuhan Institute of Technology, Wuhan, 430205, P. R. China.*

*<sup>b</sup> School of Mathematics and Physics, China University of Geosciences (Wuhan), Wuhan 430074, Wuhan, P. R. China.*

*<sup>c</sup> Beijing Computational Science Research Center, Beijing, 100193, P. R. China.*

*Address correspondence to E-mail: maliang@wit.edu.cn*

## Supporting Information

## **Contents**

**Figure S1. 1**

**Figure S2. 2**

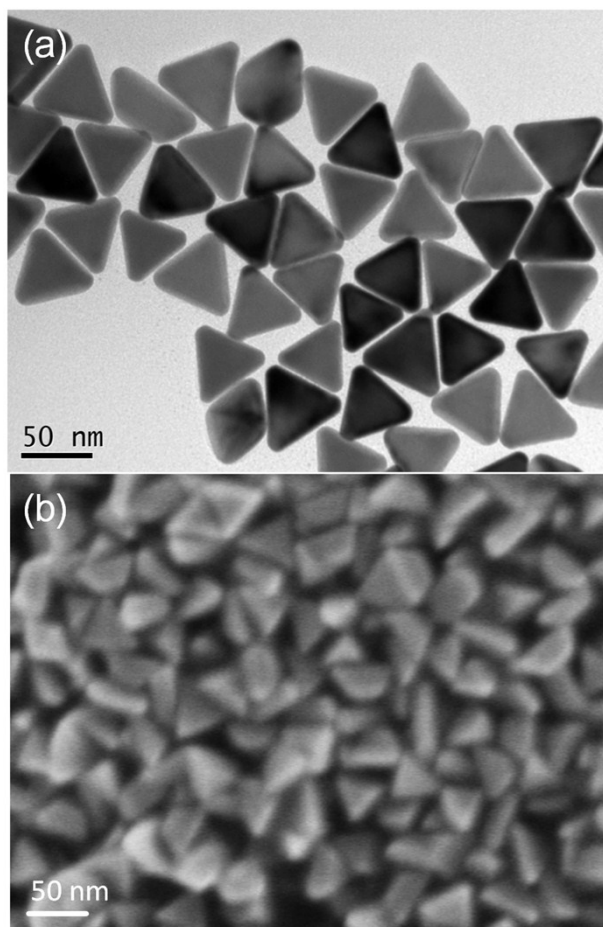

Figure S1. TEM (a) and SEM (b) images of Au nanotriangles.

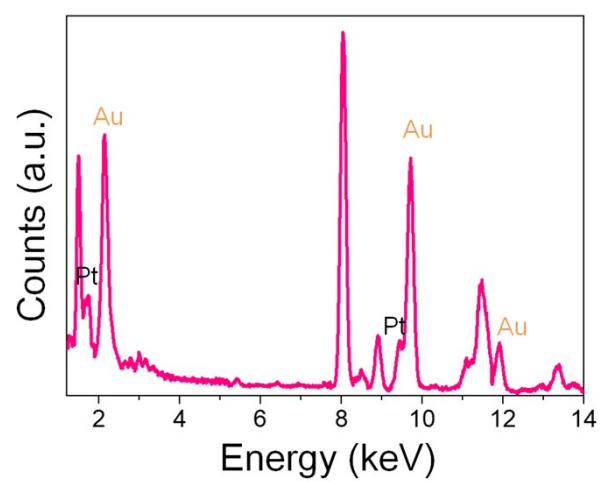

Figure S2. EDX spectrum of Au@Pt nanotriangles.
